# Supplementary material for: Characterization of Transcriptional Complexity during Adipose Tissue Development in Bovines of Different Ages and Sexes
Source: PLoS One. 2014 Jul 1;9(7):e101261. doi: 10.1371/journal.pone.0101261 (PMC4077742; doi:10.1371/journal.pone.0101261)
Supplement: Table S7 — List of KEGG pathway categories for differentially expressed genes between adipose tissue of adult bull and adiose tissue of adult steer. (XLS) [file pone.0101261.s010.xls]

## Sheet: Sheet1
	Table S7 List of KEGG pathway categories for differentially expressed genes between adipose tissue of adult bull and adiose tissue of adult steer
		Pathway	DEGs with pathway annotation	All genes with pathway annotation	P-value	Q-value	Pathway ID
	1	Type I diabetes mellitus	25 (2.02%)	59 (0.56%)	2.61729e-09	2.08511e-07	ko04940
	2	Oxidative phosphorylation	34 (2.75%)	122 (1.16%)	9.35022e-07	2.483e-05	ko00190
	3	Pathways in cancer	68 (5.5%)	367 (3.49%)	8.05324e-05	0.00106929	ko05200
	4	ECM-receptor interaction	26 (2.1%)	123 (1.17%)	0.00200348	0.0165114	ko04512
	5	Proximal tubule bicarbonate reclamation	11 (0.89%)	36 (0.34%)	0.00210547	0.0167736	ko04964
	6	p53 signaling pathway	21 (1.7%)	96 (0.91%)	0.00339138	0.0253294	ko04115
	7	Sphingolipid metabolism	12 (0.97%)	45 (0.43%)	0.00472218	0.0328918	ko00600
	8	Cytokine-cytokine receptor interaction	41 (3.31%)	232 (2.21%)	0.00481679	0.0328918	ko04060
	9	Toll-like receptor signaling pathway	25 (2.02%)	130 (1.24%)	0.00869632	0.0561736	ko04620
	10	Prostate cancer	21 (1.7%)	105 (1%)	0.00991494	0.0607608	ko05215
	11	Osteoclast differentiation	29 (2.34%)	159 (1.51%)	0.010503	0.0612248	ko04380
	12	Aldosterone-regulated sodium reabsorption	11 (0.89%)	46 (0.44%)	0.0156057	0.0867387	ko04960
	13	MAPK signaling pathway	50 (4.04%)	316 (3.01%)	0.017222	0.093547	ko04010
	14	Carbohydrate digestion and absorption	13 (1.05%)	59 (0.56%)	0.0178006	0.0945411	ko04973
	15	Butanoate metabolism	10 (0.81%)	42 (0.4%)	0.0212726	0.110525	ko00650
	16	Jak-STAT signaling pathway	26 (2.1%)	149 (1.42%)	0.0250747	0.122303	ko04630
	17	Complement and coagulation cascades	22 (1.78%)	122 (1.16%)	0.0266346	0.126349	ko04610
	18	Glyoxylate and dicarboxylate metabolism	7 (0.57%)	26 (0.25%)	0.0269614	0.126349	ko00630
	19	Melanoma	14 (1.13%)	70 (0.67%)	0.0315277	0.141169	ko05218
	20	Synthesis and degradation of ketone bodies	4 (0.32%)	11 (0.1%)	0.0318958	0.141169	ko00072
	21	Metabolic pathways	165 (13.34%)	1234 (11.74%)	0.036278	0.151811	ko01100
	22	NF-kappa B signaling pathway	24 (1.94%)	140 (1.33%)	0.0367104	0.151811	ko04064
	23	Glutathione metabolism	12 (0.97%)	60 (0.57%)	0.0444092	0.176896	ko00480
	24	Steroid biosynthesis	6 (0.49%)	23 (0.22%)	0.0455412	0.177012	ko00100
	25	Small cell lung cancer	17 (1.37%)	94 (0.89%)	0.0461106	0.177012	ko05222
	26	Endocytosis	43 (3.48%)	284 (2.7%)	0.0485354	0.181249	ko04144
	27	Pertussis	17 (1.37%)	96 (0.91%)	0.0546694	0.201015	ko05133
	28	Phenylalanine metabolism	6 (0.49%)	25 (0.24%)	0.0653338	0.236588	ko00360
	29	Amphetamine addiction	16 (1.29%)	92 (0.88%)	0.0697766	0.248905	ko05031
	30	Glioma	14 (1.13%)	79 (0.75%)	0.0757907	0.266382	ko05214
	31	Synaptic vesicle cycle	15 (1.21%)	88 (0.84%)	0.0887528	0.307419	ko04721
	32	Terpenoid backbone biosynthesis	5 (0.4%)	21 (0.2%)	0.0918442	0.313582	ko00900
	33	Protein digestion and absorption	19 (1.54%)	118 (1.12%)	0.0960013	0.323159	ko04974
	34	Arginine and proline metabolism	11 (0.89%)	61 (0.58%)	0.0973597	0.32318	ko00330
	35	Chemokine signaling pathway	32 (2.59%)	218 (2.07%)	0.109199	0.356416	ko04062
	36	Amoebiasis	23 (1.86%)	150 (1.43%)	0.110355	0.356416	ko05146
	37	Glycine, serine and threonine metabolism	9 (0.73%)	49 (0.47%)	0.115476	0.367985	ko00260
	38	MAPK signaling pathway - fly	5 (0.4%)	23 (0.22%)	0.125226	0.393803	ko04013
	39	Cocaine addiction	10 (0.81%)	58 (0.55%)	0.13814	0.428772	ko05030
	40	Phosphatidylinositol signaling system	16 (1.29%)	103 (0.98%)	0.149542	0.449816	ko04070
	41	Fructose and mannose metabolism	10 (0.81%)	59 (0.56%)	0.149879	0.449816	ko00051
	42	Vitamin B6 metabolism	2 (0.16%)	6 (0.06%)	0.150566	0.449816	ko00750
	43	Renal cell carcinoma	13 (1.05%)	82 (0.78%)	0.162248	0.476056	ko05211
	44	Biosynthesis of unsaturated fatty acids	5 (0.4%)	25 (0.24%)	0.163333	0.476056	ko01040
	45	Pyruvate metabolism	9 (0.73%)	54 (0.51%)	0.178593	0.508139	ko00620
	46	Drug metabolism - cytochrome P450	9 (0.73%)	54 (0.51%)	0.178593	0.508139	ko00982
	47	Mucin type O-Glycan biosynthesis	5 (0.4%)	26 (0.25%)	0.183925	0.511593	ko00512
	48	Cell cycle	21 (1.7%)	145 (1.38%)	0.184088	0.511593	ko04110
	49	Fc epsilon RI signaling pathway	16 (1.29%)	107 (1.02%)	0.187449	0.514946	ko04664
	50	VEGF signaling pathway	15 (1.21%)	100 (0.95%)	0.193754	0.526219	ko04370
	51	ErbB signaling pathway	15 (1.21%)	101 (0.96%)	0.204472	0.545458	ko04012
	52	Dorso-ventral axis formation	5 (0.4%)	27 (0.26%)	0.205402	0.545458	ko04320
	53	Sulfur metabolism	3 (0.24%)	14 (0.13%)	0.222477	0.578207	ko00920
	54	Glycerolipid metabolism	9 (0.73%)	57 (0.54%)	0.222574	0.578207	ko00561
	55	Cholinergic synapse	16 (1.29%)	111 (1.06%)	0.229547	0.578226	ko04725
	56	TGF-beta signaling pathway	16 (1.29%)	111 (1.06%)	0.229547	0.578226	ko04350
	57	Amino sugar and nucleotide sugar metabolism	10 (0.81%)	65 (0.62%)	0.229839	0.578226	ko00520
	58	Axon guidance	26 (2.1%)	190 (1.81%)	0.233268	0.580739	ko04360
	59	Fc gamma R-mediated phagocytosis	20 (1.62%)	143 (1.36%)	0.237154	0.584327	ko04666
	60	Glycerophospholipid metabolism	13 (1.05%)	89 (0.85%)	0.244168	0.595471	ko00564
	61	Fatty acid elongation	5 (0.4%)	29 (0.28%)	0.250561	0.60489	ko00062
	62	Type II diabetes mellitus	10 (0.81%)	67 (0.64%)	0.259563	0.620356	ko04930
	63	Gap junction	13 (1.05%)	92 (0.88%)	0.283388	0.670591	ko04540
	64	Calcium signaling pathway	24 (1.94%)	181 (1.72%)	0.296829	0.693661	ko04020
	65	Cardiac muscle contraction	20 (1.62%)	149 (1.42%)	0.298942	0.693661	ko04260
	66	mTOR signaling pathway	10 (0.81%)	70 (0.67%)	0.306267	0.703826	ko04150
	67	Salivary secretion	16 (1.29%)	118 (1.12%)	0.311336	0.70598	ko04970
	68	D-Glutamine and D-glutamate metabolism	1 (0.08%)	3 (0.03%)	0.313112	0.70598	ko00471
	69	Leukocyte transendothelial migration	24 (1.94%)	184 (1.75%)	0.326349	0.728104	ko04670
	70	Collecting duct acid secretion	6 (0.49%)	40 (0.38%)	0.329018	0.728104	ko04966
	71	Chronic myeloid leukemia	13 (1.05%)	96 (0.91%)	0.338366	0.729326	ko05220
	72	Colorectal cancer	10 (0.81%)	72 (0.68%)	0.33846	0.729326	ko05210
	73	Bile secretion	12 (0.97%)	88 (0.84%)	0.338725	0.729326	ko04976
	74	Citrate cycle (TCA cycle)	5 (0.4%)	33 (0.31%)	0.346485	0.739375	ko00020
	75	Insulin signaling pathway	22 (1.78%)	170 (1.62%)	0.350166	0.740616	ko04910
	76	Endometrial cancer	8 (0.65%)	57 (0.54%)	0.354513	0.743234	ko05213
	77	Glycosaminoglycan biosynthesis - heparan sulfate	4 (0.32%)	26 (0.25%)	0.366595	0.761881	ko00534
	78	Basal cell carcinoma	6 (0.49%)	42 (0.4%)	0.372886	0.768274	ko05217
	79	Fatty acid biosynthesis	2 (0.16%)	11 (0.1%)	0.377553	0.77124	ko00061
	80	Endocrine and other factor-regulated calcium reabsorption	8 (0.65%)	59 (0.56%)	0.391838	0.774317	ko04961
	81	Caffeine metabolism	1 (0.08%)	4 (0.04%)	0.393957	0.774317	ko00232
	82	Butirosin and neomycin biosynthesis	1 (0.08%)	4 (0.04%)	0.393957	0.774317	ko00524
	83	Tryptophan metabolism	6 (0.49%)	43 (0.41%)	0.394912	0.774317	ko00380
	84	Progesterone-mediated oocyte maturation	13 (1.05%)	100 (0.95%)	0.395258	0.774317	ko04914
	85	Ubiquinone and other terpenoid-quinone biosynthesis	2 (0.16%)	12 (0.11%)	0.421133	0.818299	ko00130
	86	Primary bile acid biosynthesis	4 (0.32%)	29 (0.28%)	0.449962	0.867265	ko00120
	87	Fat digestion and absorption	7 (0.57%)	56 (0.53%)	0.493428	0.943434	ko04975
	88	Mineral absorption	7 (0.57%)	57 (0.54%)	0.512876	0.95871	ko04978
	89	Glycosylphosphatidylinositol(GPI)-anchor biosynthesis	3 (0.24%)	23 (0.22%)	0.518906	0.95871	ko00563
	90	Metabolism of xenobiotics by cytochrome P450	8 (0.65%)	66 (0.63%)	0.521108	0.95871	ko00980
	91	Lipoic acid metabolism	1 (0.08%)	6 (0.06%)	0.528239	0.95871	ko00785
	92	Circadian rhythm - fly	1 (0.08%)	6 (0.06%)	0.528239	0.95871	ko04711
	93	D-Arginine and D-ornithine metabolism	1 (0.08%)	6 (0.06%)	0.528239	0.95871	ko00472
	94	ABC transporters	4 (0.32%)	32 (0.3%)	0.529497	0.95871	ko02010
	95	Glycosphingolipid biosynthesis - ganglio series	2 (0.16%)	15 (0.14%)	0.541291	0.970419	ko00604
	96	Long-term depression	9 (0.73%)	76 (0.72%)	0.545046	0.970419	ko04730
	97	Glycosaminoglycan biosynthesis - chondroitin sulfate	3 (0.24%)	24 (0.23%)	0.548683	0.970419	ko00532
	98	Oocyte meiosis	16 (1.29%)	137 (1.3%)	0.552778	0.970419	ko04114
	99	GnRH signaling pathway	14 (1.13%)	120 (1.14%)	0.556265	0.970419	ko04912
	100	Prion diseases	8 (0.65%)	69 (0.66%)	0.573692	0.993567	ko05020
	101	Alanine, aspartate and glutamate metabolism	4 (0.32%)	34 (0.32%)	0.57924	0.995959	ko00250
	102	Glutamatergic synapse	15 (1.21%)	131 (1.25%)	0.585845	0.999073	ko04724
	103	Dopaminergic synapse	17 (1.37%)	149 (1.42%)	0.592554	0.999073	ko04728
	104	Legionellosis	9 (0.73%)	79 (0.75%)	0.593592	0.999073	ko05134
	105	Hedgehog signaling pathway	5 (0.4%)	44 (0.42%)	0.602966	0.999999	ko04340
	106	Phototransduction	6 (0.49%)	53 (0.5%)	0.603937	0.999999	ko04744
	107	Glycosaminoglycan degradation	2 (0.16%)	17 (0.16%)	0.611221	0.999999	ko00531
	108	Pantothenate and CoA biosynthesis	2 (0.16%)	17 (0.16%)	0.611221	0.999999	ko00770
	109	Notch signaling pathway	5 (0.4%)	45 (0.43%)	0.623487	0.999999	ko04330
	110	Gastric acid secretion	13 (1.05%)	117 (1.11%)	0.630572	0.999999	ko04971
	111	Nicotinate and nicotinamide metabolism	3 (0.24%)	27 (0.26%)	0.631111	0.999999	ko00760
	112	Pancreatic cancer	9 (0.73%)	82 (0.78%)	0.63953	0.999999	ko05212
	113	Serotonergic synapse	15 (1.21%)	136 (1.29%)	0.645699	0.999999	ko04726
	114	Melanogenesis	11 (0.89%)	101 (0.96%)	0.654197	0.999999	ko04916
	115	Apoptosis	11 (0.89%)	101 (0.96%)	0.654197	0.999999	ko04210
	116	Lysine degradation	7 (0.57%)	66 (0.63%)	0.672278	0.999999	ko00310
	117	Circadian rhythm - mammal	2 (0.16%)	19 (0.18%)	0.672701	0.999999	ko04710
	118	Taurine and hypotaurine metabolism	1 (0.08%)	9 (0.09%)	0.676027	0.999999	ko00430
	119	NOD-like receptor signaling pathway	10 (0.81%)	94 (0.89%)	0.680958	0.999999	ko04621
	120	Cysteine and methionine metabolism	4 (0.32%)	39 (0.37%)	0.689255	0.999999	ko00270
	121	One carbon pool by folate	2 (0.16%)	20 (0.19%)	0.700357	0.999999	ko00670
	122	Valine, leucine and isoleucine degradation	6 (0.49%)	59 (0.56%)	0.708376	0.999999	ko00280
	123	Alcoholism	16 (1.29%)	151 (1.44%)	0.710608	0.999999	ko05034
	124	PPAR signaling pathway	12 (0.97%)	115 (1.09%)	0.714542	0.999999	ko03320
	125	Neurotrophin signaling pathway	19 (1.54%)	179 (1.7%)	0.719206	0.999999	ko04722
	126	Neuroactive ligand-receptor interaction	25 (2.02%)	233 (2.22%)	0.720097	0.999999	ko04080
	127	Regulation of actin cytoskeleton	36 (2.91%)	332 (3.16%)	0.72706	0.999999	ko04810
	128	Propanoate metabolism	4 (0.32%)	41 (0.39%)	0.727082	0.999999	ko00640
	129	Pathogenic Escherichia coli infection	15 (1.21%)	145 (1.38%)	0.740968	0.999999	ko05130
	130	Galactose metabolism	3 (0.24%)	32 (0.3%)	0.743898	0.999999	ko00052
	131	Epithelial cell signaling in Helicobacter pylori infection	8 (0.65%)	82 (0.78%)	0.76396	0.999999	ko05120
	132	Pancreatic secretion	13 (1.05%)	129 (1.23%)	0.764417	0.999999	ko04972
	133	Tyrosine metabolism	4 (0.32%)	44 (0.42%)	0.7772	0.999999	ko00350
	134	Starch and sucrose metabolism	4 (0.32%)	44 (0.42%)	0.7772	0.999999	ko00500
	135	Riboflavin metabolism	1 (0.08%)	12 (0.11%)	0.777544	0.999999	ko00740
	136	Drug metabolism - other enzymes	3 (0.24%)	34 (0.32%)	0.780579	0.999999	ko00983
	137	RIG-I-like receptor signaling pathway	7 (0.57%)	74 (0.7%)	0.783056	0.999999	ko04622
	138	Long-term potentiation	8 (0.65%)	84 (0.8%)	0.786949	0.999999	ko04720
	139	Pentose phosphate pathway	3 (0.24%)	35 (0.33%)	0.797232	0.999999	ko00030
	140	GABAergic synapse	9 (0.73%)	95 (0.9%)	0.801358	0.999999	ko04727
	141	Sulfur relay system	1 (0.08%)	13 (0.12%)	0.803748	0.999999	ko04122
	142	Glycosphingolipid biosynthesis - globo series	1 (0.08%)	13 (0.12%)	0.803748	0.999999	ko00603
	143	Inositol phosphate metabolism	6 (0.49%)	68 (0.65%)	0.82671	0.999999	ko00562
	144	SNARE interactions in vesicular transport	3 (0.24%)	38 (0.36%)	0.840943	0.999999	ko04130
	145	Glycosaminoglycan biosynthesis - keratan sulfate	1 (0.08%)	15 (0.14%)	0.847267	0.999999	ko00533
	146	Retrograde endocannabinoid signaling	9 (0.73%)	101 (0.96%)	0.854741	0.999999	ko04723
	147	Histidine metabolism	2 (0.16%)	28 (0.27%)	0.858131	0.999999	ko00340
	148	alpha-Linolenic acid metabolism	2 (0.16%)	28 (0.27%)	0.858131	0.999999	ko00592
	149	Other glycan degradation	1 (0.08%)	16 (0.15%)	0.865264	0.999999	ko00511
	150	Linoleic acid metabolism	3 (0.24%)	40 (0.38%)	0.865338	0.999999	ko00591
	151	Taste transduction	3 (0.24%)	40 (0.38%)	0.865338	0.999999	ko04742
	152	Wnt signaling pathway	15 (1.21%)	162 (1.54%)	0.871025	0.999999	ko04310
	153	Amyotrophic lateral sclerosis (ALS)	7 (0.57%)	83 (0.79%)	0.871323	0.999999	ko05014
	154	Ether lipid metabolism	4 (0.32%)	52 (0.49%)	0.875631	0.999999	ko00565
	155	Phototransduction - fly	4 (0.32%)	53 (0.5%)	0.88481	0.999999	ko04745
	156	Olfactory transduction	6 (0.49%)	75 (0.71%)	0.889344	0.999999	ko04740
	157	Vitamin digestion and absorption	3 (0.24%)	43 (0.41%)	0.895752	0.999999	ko04977
	158	Vascular smooth muscle contraction	21 (1.7%)	225 (2.14%)	0.897385	0.999999	ko04270
	159	Morphine addiction	7 (0.57%)	87 (0.83%)	0.899751	0.999999	ko05032
	160	Bacterial invasion of epithelial cells	10 (0.81%)	118 (1.12%)	0.900925	0.999999	ko05100
	161	Proteasome	3 (0.24%)	44 (0.42%)	0.904427	0.999999	ko03050
	162	Lysosome	13 (1.05%)	150 (1.43%)	0.910358	0.999999	ko04142
	163	Nicotine addiction	2 (0.16%)	33 (0.31%)	0.913566	0.999999	ko05033
	164	Thyroid cancer	2 (0.16%)	34 (0.32%)	0.921878	0.999999	ko05216
	165	Adherens junction	11 (0.89%)	133 (1.27%)	0.924305	0.999999	ko04520
	166	Arachidonic acid metabolism	6 (0.49%)	81 (0.77%)	0.926612	0.999999	ko00590
	167	Fanconi anemia pathway	3 (0.24%)	47 (0.45%)	0.926668	0.999999	ko03460
	168	Arrhythmogenic right ventricular cardiomyopathy (ARVC)	7 (0.57%)	93 (0.88%)	0.9323	0.999999	ko05412
	169	Pentose and glucuronate interconversions	1 (0.08%)	22 (0.21%)	0.936514	0.999999	ko00040
	170	Fatty acid metabolism	3 (0.24%)	49 (0.47%)	0.938743	0.999999	ko00071
	171	Adipocytokine signaling pathway	7 (0.57%)	95 (0.9%)	0.940871	0.999999	ko04920
	172	N-Glycan biosynthesis	3 (0.24%)	50 (0.48%)	0.944065	0.999999	ko00510
	173	Steroid hormone biosynthesis	3 (0.24%)	50 (0.48%)	0.944065	0.999999	ko00140
	174	Peroxisome	8 (0.65%)	107 (1.02%)	0.945387	0.999999	ko04146
	175	Cytosolic DNA-sensing pathway	4 (0.32%)	64 (0.61%)	0.952664	0.999999	ko04623
	176	Glycolysis / Gluconeogenesis	4 (0.32%)	64 (0.61%)	0.952664	0.999999	ko00010
	177	Glycosphingolipid biosynthesis - lacto and neolacto series	1 (0.08%)	25 (0.24%)	0.956429	0.999999	ko00601
	178	Retinol metabolism	3 (0.24%)	53 (0.5%)	0.957562	0.999999	ko00830
	179	Vibrio cholerae infection	5 (0.4%)	78 (0.74%)	0.960503	0.999999	ko05110
	180	Salmonella infection	15 (1.21%)	186 (1.77%)	0.960862	0.999999	ko05132
	181	RNA degradation	6 (0.49%)	91 (0.87%)	0.964664	0.999999	ko03018
	182	Tight junction	22 (1.78%)	262 (2.49%)	0.96962	0.999999	ko04530
	183	mRNA surveillance pathway	7 (0.57%)	105 (1%)	0.970859	0.999999	ko03015
	184	Hypertrophic cardiomyopathy (HCM)	14 (1.13%)	181 (1.72%)	0.971025	0.999999	ko05410
	185	Dilated cardiomyopathy	14 (1.13%)	186 (1.77%)	0.978365	0.999999	ko05414
	186	Ubiquitin mediated proteolysis	12 (0.97%)	168 (1.6%)	0.982542	0.999999	ko04120
	187	beta-Alanine metabolism	1 (0.08%)	34 (0.32%)	0.985925	0.999999	ko00410
	188	Regulation of autophagy	1 (0.08%)	36 (0.34%)	0.989052	0.999999	ko04140
	189	RNA polymerase	1 (0.08%)	36 (0.34%)	0.989052	0.999999	ko03020
	190	Nucleotide excision repair	2 (0.16%)	53 (0.5%)	0.989532	0.999999	ko03420
	191	Purine metabolism	13 (1.05%)	188 (1.79%)	0.990248	0.999999	ko00230
	192	Ribosome biogenesis in eukaryotes	4 (0.32%)	83 (0.79%)	0.991263	0.999999	ko03008
	193	Pyrimidine metabolism	6 (0.49%)	113 (1.07%)	0.99399	0.999999	ko00240
	194	Basal transcription factors	1 (0.08%)	43 (0.41%)	0.995458	0.999999	ko03022
	195	Aminoacyl-tRNA biosynthesis	2 (0.16%)	61 (0.58%)	0.995667	0.999999	ko00970
	196	Other types of O-glycan biosynthesis	1 (0.08%)	48 (0.46%)	0.997578	0.999999	ko00514
	197	Vasopressin-regulated water reabsorption	1 (0.08%)	49 (0.47%)	0.997864	0.999999	ko04962
	198	Shigellosis	4 (0.32%)	111 (1.06%)	0.999427	0.999999	ko05131
	199	RNA transport	7 (0.57%)	187 (1.78%)	0.999976	0.999999	ko03013
	200	Spliceosome	6 (0.49%)	174 (1.66%)	0.999979	0.999999	ko03040
	201	Protein processing in endoplasmic reticulum	5 (0.4%)	192 (1.83%)	0.999999	0.999999	ko04141
