# Supplementary material for: Characterization of Transcriptional Complexity during Adipose Tissue Development in Bovines of Different Ages and Sexes
Source: PLoS One. 2014 Jul 1;9(7):e101261. doi: 10.1371/journal.pone.0101261 (PMC4077742; doi:10.1371/journal.pone.0101261)
Supplement: Table S9 — List of KEGG pathway categories for differentially expressed genes between adipose tissue of adult heifer and adiose tissue of adult steer. (XLS) [file pone.0101261.s012.xls]

## Sheet: Sheet1
	Table S9 List of KEGG pathway categories for differentially expressed genes between adipose tissue of adult heifer and adiose tissue of adult steer
		Pathway	DEGs with pathway annotation	All genes with pathway annotation	P-value	Q-value	Pathway ID
	1	Steroid biosynthesis	8 (1.91%)	23 (0.22%)	1.69263e-06	7.88843e-05	ko00100
	2	Type I diabetes mellitus	12 (2.87%)	59 (0.56%)	2.73362e-06	7.88843e-05	ko04940
	3	Hematopoietic cell lineage	16 (3.83%)	105 (1%)	3.55076e-06	8.96566e-05	ko04640
	4	Glutathione metabolism	10 (2.39%)	60 (0.57%)	0.000112377	0.00193162	ko00480
	5	Butanoate metabolism	7 (1.67%)	42 (0.4%)	0.00120625	0.0135368	ko00650
	6	Biosynthesis of unsaturated fatty acids	5 (1.2%)	25 (0.24%)	0.00266636	0.0269302	ko01040
	7	Metabolic pathways	68 (16.27%)	1234 (11.74%)	0.0030025	0.0288812	ko01100
	8	Cytokine-cytokine receptor interaction	18 (4.31%)	232 (2.21%)	0.00518326	0.0455226	ko04060
	9	Complement and coagulation cascades	10 (2.39%)	122 (1.16%)	0.0233657	0.143027	ko04610
	10	Fatty acid elongation	4 (0.96%)	29 (0.28%)	0.0266398	0.154252	ko00062
	11	PPAR signaling pathway	9 (2.15%)	115 (1.09%)	0.0394532	0.221376	ko03320
	12	Protein digestion and absorption	9 (2.15%)	118 (1.12%)	0.0452936	0.234598	ko04974
	13	Phenylalanine metabolism	3 (0.72%)	25 (0.24%)	0.0751863	0.348226	ko00360
	14	Mineral absorption	5 (1.2%)	57 (0.54%)	0.0752953	0.348226	ko04978
	15	Glycerolipid metabolism	5 (1.2%)	57 (0.54%)	0.0752953	0.348226	ko00561
	16	Tryptophan metabolism	4 (0.96%)	43 (0.41%)	0.0902489	0.39631	ko00380
	17	Hedgehog signaling pathway	4 (0.96%)	44 (0.42%)	0.0963248	0.413992	ko04340
	18	Sphingolipid metabolism	4 (0.96%)	45 (0.43%)	0.102588	0.422953	ko00600
	19	Epstein-Barr virus infection	14 (3.35%)	242 (2.3%)	0.102597	0.422953	ko05169
	20	Renal cell carcinoma	6 (1.44%)	82 (0.78%)	0.107396	0.433881	ko05211
	21	Prostate cancer	7 (1.67%)	105 (1%)	0.124396	0.492706	ko05215
	22	Glycine, serine and threonine metabolism	4 (0.96%)	49 (0.47%)	0.129407	0.49321	ko00260
	23	Pantothenate and CoA biosynthesis	2 (0.48%)	17 (0.16%)	0.145025	0.54044	ko00770
	24	Caffeine metabolism	1 (0.24%)	4 (0.04%)	0.149825	0.54044	ko00232
	25	Butirosin and neomycin biosynthesis	1 (0.24%)	4 (0.04%)	0.149825	0.54044	ko00524
	26	Pyruvate metabolism	4 (0.96%)	54 (0.51%)	0.166495	0.590034	ko00620
	27	Proximal tubule bicarbonate reclamation	3 (0.72%)	36 (0.34%)	0.170978	0.594604	ko04964
	28	Adipocytokine signaling pathway	6 (1.44%)	95 (0.9%)	0.176555	0.594604	ko04920
	29	Fat digestion and absorption	4 (0.96%)	56 (0.53%)	0.182285	0.594604	ko04975
	30	p53 signaling pathway	6 (1.44%)	96 (0.91%)	0.182502	0.594604	ko04115
	31	Fructose and mannose metabolism	4 (0.96%)	59 (0.56%)	0.206836	0.658796	ko00051
	32	Pathways in cancer	18 (4.31%)	367 (3.49%)	0.210106	0.658796	ko05200
	33	Oxidative phosphorylation	7 (1.67%)	122 (1.16%)	0.211989	0.658796	ko00190
	34	Arginine and proline metabolism	4 (0.96%)	61 (0.58%)	0.223705	0.684674	ko00330
	35	MAPK signaling pathway - fly	2 (0.48%)	23 (0.22%)	0.232074	0.691686	ko04013
	36	Basal cell carcinoma	3 (0.72%)	42 (0.4%)	0.232845	0.691686	ko05217
	37	Chemokine signaling pathway	11 (2.63%)	218 (2.07%)	0.250644	0.729107	ko04062
	38	Alcoholism	8 (1.91%)	151 (1.44%)	0.252661	0.729107	ko05034
	39	B cell receptor signaling pathway	6 (1.44%)	108 (1.03%)	0.25928	0.73767	ko04662
	40	Bile secretion	5 (1.2%)	88 (0.84%)	0.271943	0.76295	ko04976
	41	Glyoxylate and dicarboxylate metabolism	2 (0.48%)	26 (0.25%)	0.276864	0.763338	ko00630
	42	Glycerophospholipid metabolism	5 (1.2%)	89 (0.85%)	0.279639	0.763338	ko00564
	43	Dorso-ventral axis formation	2 (0.48%)	27 (0.26%)	0.291789	0.780509	ko04320
	44	Calcium signaling pathway	9 (2.15%)	181 (1.72%)	0.293657	0.780509	ko04020
	45	Oocyte meiosis	7 (1.67%)	137 (1.3%)	0.303266	0.788442	ko04114
	46	Natural killer cell mediated cytotoxicity	8 (1.91%)	160 (1.52%)	0.304448	0.788442	ko04650
	47	Fatty acid metabolism	3 (0.72%)	49 (0.47%)	0.308936	0.789938	ko00071
	48	Wnt signaling pathway	8 (1.91%)	162 (1.54%)	0.316277	0.791037	ko04310
	49	Steroid hormone biosynthesis	3 (0.72%)	50 (0.48%)	0.319941	0.791037	ko00140
	50	Porphyrin and chlorophyll metabolism	2 (0.48%)	29 (0.28%)	0.321497	0.791037	ko00860
	51	Salivary secretion	6 (1.44%)	118 (1.12%)	0.328648	0.791037	ko04970
	52	Hepatitis C	7 (1.67%)	141 (1.34%)	0.328946	0.791037	ko05160
	53	Axon guidance	9 (2.15%)	190 (1.81%)	0.343618	0.813094	ko04360
	54	Retinol metabolism	3 (0.72%)	53 (0.5%)	0.352943	0.813094	ko00830
	55	Fatty acid biosynthesis	1 (0.24%)	11 (0.1%)	0.360144	0.813094	ko00061
	56	Insulin signaling pathway	8 (1.91%)	170 (1.62%)	0.36436	0.813094	ko04910
	57	Galactose metabolism	2 (0.48%)	32 (0.3%)	0.365421	0.813094	ko00052
	58	ABC transporters	2 (0.48%)	32 (0.3%)	0.365421	0.813094	ko02010
	59	Progesterone-mediated oocyte maturation	5 (1.2%)	100 (0.95%)	0.366295	0.813094	ko04914
	60	Legionellosis	4 (0.96%)	79 (0.75%)	0.385041	0.837565	ko05134
	61	Ubiquinone and other terpenoid-quinone biosynthesis	1 (0.24%)	12 (0.11%)	0.385612	0.837565	ko00130
	62	Transcriptional misregulation in cancer	10 (2.39%)	225 (2.14%)	0.40518	0.852779	ko05202
	63	Cocaine addiction	3 (0.72%)	58 (0.55%)	0.407406	0.852779	ko05030
	64	Pentose phosphate pathway	2 (0.48%)	35 (0.33%)	0.408213	0.852779	ko00030
	65	Sulfur relay system	1 (0.24%)	13 (0.12%)	0.410068	0.852779	ko04122
	66	Valine, leucine and isoleucine degradation	3 (0.72%)	59 (0.56%)	0.418151	0.852779	ko00280
	67	Measles	7 (1.67%)	155 (1.47%)	0.420496	0.852779	ko05162
	68	Base excision repair	2 (0.48%)	36 (0.34%)	0.422168	0.852779	ko03410
	69	Sulfur metabolism	1 (0.24%)	14 (0.13%)	0.433553	0.867106	ko00920
	70	Osteoclast differentiation	7 (1.67%)	159 (1.51%)	0.446633	0.884509	ko04380
	71	TGF-beta signaling pathway	5 (1.2%)	111 (1.06%)	0.453367	0.889128	ko04350
	72	Linoleic acid metabolism	2 (0.48%)	40 (0.38%)	0.476196	0.915021	ko00591
	73	Collecting duct acid secretion	2 (0.48%)	40 (0.38%)	0.476196	0.915021	ko04966
	74	Amino sugar and nucleotide sugar metabolism	3 (0.72%)	65 (0.62%)	0.481071	0.915021	ko00520
	75	NF-kappa B signaling pathway	6 (1.44%)	140 (1.33%)	0.485002	0.915021	ko04064
	76	Propanoate metabolism	2 (0.48%)	41 (0.39%)	0.489219	0.915021	ko00640
	77	Renin-angiotensin system	1 (0.24%)	17 (0.16%)	0.498557	0.920634	ko04614
	78	Type II diabetes mellitus	3 (0.72%)	67 (0.64%)	0.501335	0.920634	ko04930
	79	Pathogenic Escherichia coli infection	6 (1.44%)	145 (1.38%)	0.519358	0.933886	ko05130
	80	Cell cycle	6 (1.44%)	145 (1.38%)	0.519358	0.933886	ko04110
	81	GABAergic synapse	4 (0.96%)	95 (0.9%)	0.525792	0.933886	ko04727
	82	Starch and sucrose metabolism	2 (0.48%)	44 (0.42%)	0.527044	0.933886	ko00500
	83	Circadian rhythm - mammal	1 (0.24%)	19 (0.18%)	0.537703	0.944488	ko04710
	84	Jak-STAT signaling pathway	6 (1.44%)	149 (1.42%)	0.546187	0.951118	ko04630
	85	ErbB signaling pathway	4 (0.96%)	101 (0.96%)	0.574561	0.991978	ko04012
	86	Neuroactive ligand-receptor interaction	9 (2.15%)	233 (2.22%)	0.583675	0.995946	ko04080
	87	Peroxisome	4 (0.96%)	107 (1.02%)	0.620382	0.995946	ko04146
	88	Glycosaminoglycan biosynthesis - chondroitin sulfate	1 (0.24%)	24 (0.23%)	0.622741	0.995946	ko00532
	89	Phototransduction	2 (0.48%)	53 (0.5%)	0.628714	0.995946	ko04744
	90	Mucin type O-Glycan biosynthesis	1 (0.24%)	26 (0.25%)	0.652212	0.995946	ko00512
	91	Glycosaminoglycan biosynthesis - heparan sulfate	1 (0.24%)	26 (0.25%)	0.652212	0.995946	ko00534
	92	Histidine metabolism	1 (0.24%)	28 (0.27%)	0.679386	0.995946	ko00340
	93	Carbohydrate digestion and absorption	2 (0.48%)	59 (0.56%)	0.686545	0.995946	ko04973
	94	Primary bile acid biosynthesis	1 (0.24%)	29 (0.28%)	0.692168	0.995946	ko00120
	95	Gap junction	3 (0.72%)	92 (0.88%)	0.71442	0.995946	ko04540
	96	Amphetamine addiction	3 (0.72%)	92 (0.88%)	0.71442	0.995946	ko05031
	97	Tight junction	9 (2.15%)	262 (2.49%)	0.720334	0.995946	ko04530
	98	Glycolysis / Gluconeogenesis	2 (0.48%)	64 (0.61%)	0.728914	0.995946	ko00010
	99	Chagas disease (American trypanosomiasis)	4 (0.96%)	124 (1.18%)	0.732333	0.995946	ko05142
	100	Citrate cycle (TCA cycle)	1 (0.24%)	33 (0.31%)	0.738409	0.995946	ko00020
	101	Drug metabolism - other enzymes	1 (0.24%)	34 (0.32%)	0.748842	0.995946	ko00983
	102	Inositol phosphate metabolism	2 (0.48%)	68 (0.65%)	0.759227	0.995946	ko00562
	103	Toll-like receptor signaling pathway	4 (0.96%)	130 (1.24%)	0.76538	0.995946	ko04620
	104	Regulation of autophagy	1 (0.24%)	36 (0.34%)	0.768481	0.995946	ko04140
	105	Melanogenesis	3 (0.72%)	101 (0.96%)	0.771524	0.995946	ko04916
	106	Apoptosis	3 (0.72%)	101 (0.96%)	0.771524	0.995946	ko04210
	107	mTOR signaling pathway	2 (0.48%)	70 (0.67%)	0.773256	0.995946	ko04150
	108	T cell receptor signaling pathway	4 (0.96%)	133 (1.27%)	0.780672	0.995946	ko04660
	109	Phosphatidylinositol signaling system	3 (0.72%)	103 (0.98%)	0.782867	0.995946	ko04070
	110	Acute myeloid leukemia	2 (0.48%)	73 (0.69%)	0.792961	0.995946	ko05221
	111	Cysteine and methionine metabolism	1 (0.24%)	39 (0.37%)	0.795103	0.995946	ko00270
	112	Serotonergic synapse	4 (0.96%)	136 (1.29%)	0.795164	0.995946	ko04726
	113	Endocytosis	9 (2.15%)	284 (2.7%)	0.802017	0.995946	ko04144
	114	Glioma	2 (0.48%)	79 (0.75%)	0.827884	0.995946	ko05214
	115	Tyrosine metabolism	1 (0.24%)	44 (0.42%)	0.832859	0.995946	ko00350
	116	Notch signaling pathway	1 (0.24%)	45 (0.43%)	0.839533	0.995946	ko04330
	117	Epithelial cell signaling in Helicobacter pylori infection	2 (0.48%)	82 (0.78%)	0.843282	0.995946	ko05120
	118	Pancreatic cancer	2 (0.48%)	82 (0.78%)	0.843282	0.995946	ko05212
	119	Aldosterone-regulated sodium reabsorption	1 (0.24%)	46 (0.44%)	0.84594	0.995946	ko04960
	120	Cardiac muscle contraction	4 (0.96%)	149 (1.42%)	0.84927	0.995946	ko04260
	121	Dopaminergic synapse	4 (0.96%)	149 (1.42%)	0.84927	0.995946	ko04728
	122	Gastric acid secretion	3 (0.72%)	117 (1.11%)	0.849822	0.995946	ko04971
	123	Long-term potentiation	2 (0.48%)	84 (0.8%)	0.852842	0.995946	ko04720
	124	GnRH signaling pathway	3 (0.72%)	120 (1.14%)	0.861587	0.995946	ko04912
	125	Morphine addiction	2 (0.48%)	87 (0.83%)	0.86619	0.995946	ko05032
	126	RNA degradation	2 (0.48%)	91 (0.87%)	0.882262	0.995946	ko03018
	127	Phototransduction - fly	1 (0.24%)	53 (0.5%)	0.884187	0.995946	ko04745
	128	Pancreatic secretion	3 (0.72%)	129 (1.23%)	0.892162	0.995946	ko04972
	129	NOD-like receptor signaling pathway	2 (0.48%)	94 (0.89%)	0.893126	0.995946	ko04621
	130	Glutamatergic synapse	3 (0.72%)	131 (1.25%)	0.898077	0.995946	ko04724
	131	Endometrial cancer	1 (0.24%)	57 (0.54%)	0.901621	0.995946	ko05213
	132	Non-small cell lung cancer	1 (0.24%)	58 (0.55%)	0.905554	0.995946	ko05223
	133	Endocrine and other factor-regulated calcium reabsorption	1 (0.24%)	59 (0.56%)	0.90933	0.995946	ko04961
	134	VEGF signaling pathway	2 (0.48%)	100 (0.95%)	0.912115	0.995946	ko04370
	135	mRNA surveillance pathway	2 (0.48%)	105 (1%)	0.925477	0.995946	ko03015
	136	Neurotrophin signaling pathway	4 (0.96%)	179 (1.7%)	0.929806	0.995946	ko04722
	137	Fc epsilon RI signaling pathway	2 (0.48%)	107 (1.02%)	0.930267	0.995946	ko04664
	138	Lysine degradation	1 (0.24%)	66 (0.63%)	0.931865	0.995946	ko00310
	139	Leukocyte transendothelial migration	4 (0.96%)	184 (1.75%)	0.938609	0.995946	ko04670
	140	Cholinergic synapse	2 (0.48%)	111 (1.06%)	0.938987	0.995946	ko04725
	141	Dilated cardiomyopathy	4 (0.96%)	186 (1.77%)	0.94184	0.995946	ko05414
	142	Melanoma	1 (0.24%)	70 (0.67%)	0.942134	0.995946	ko05218
	143	Colorectal cancer	1 (0.24%)	72 (0.68%)	0.946673	0.995946	ko05210
	144	RIG-I-like receptor signaling pathway	1 (0.24%)	74 (0.7%)	0.950858	0.995946	ko04622
	145	Bacterial invasion of epithelial cells	2 (0.48%)	118 (1.12%)	0.951813	0.995946	ko05100
	146	Olfactory transduction	1 (0.24%)	75 (0.71%)	0.952826	0.995946	ko04740
	147	Vibrio cholerae infection	1 (0.24%)	78 (0.74%)	0.95827	0.995946	ko05110
	148	Arachidonic acid metabolism	1 (0.24%)	81 (0.77%)	0.963087	0.995946	ko00590
	149	Ubiquitin mediated proteolysis	3 (0.72%)	168 (1.6%)	0.965925	0.995946	ko04120
	150	Ribosome biogenesis in eukaryotes	1 (0.24%)	83 (0.79%)	0.965986	0.995946	ko03008
	151	Amyotrophic lateral sclerosis (ALS)	1 (0.24%)	83 (0.79%)	0.965986	0.995946	ko05014
	152	Adherens junction	2 (0.48%)	133 (1.27%)	0.971188	0.995946	ko04520
	153	Spliceosome	3 (0.72%)	174 (1.66%)	0.971699	0.995946	ko03040
	154	Synaptic vesicle cycle	1 (0.24%)	88 (0.84%)	0.972278	0.995946	ko04721
	155	Hypertrophic cardiomyopathy (HCM)	3 (0.72%)	181 (1.72%)	0.977266	0.995946	ko05410
	156	Arrhythmogenic right ventricular cardiomyopathy (ARVC)	1 (0.24%)	93 (0.88%)	0.977408	0.995946	ko05412
	157	Small cell lung cancer	1 (0.24%)	94 (0.89%)	0.978315	0.995946	ko05222
	158	Fc gamma R-mediated phagocytosis	2 (0.48%)	143 (1.36%)	0.979667	0.995946	ko04666
	159	Pertussis	1 (0.24%)	96 (0.91%)	0.98002	0.995946	ko05133
	160	Chronic myeloid leukemia	1 (0.24%)	96 (0.91%)	0.98002	0.995946	ko05220
	161	Regulation of actin cytoskeleton	7 (1.67%)	332 (3.16%)	0.980362	0.995946	ko04810
	162	Salmonella infection	3 (0.72%)	186 (1.77%)	0.980587	0.995946	ko05132
	163	Retrograde endocannabinoid signaling	1 (0.24%)	101 (0.96%)	0.98372	0.995946	ko04723
	164	Lysosome	2 (0.48%)	150 (1.43%)	0.984107	0.995946	ko04142
	165	MAPK signaling pathway	6 (1.44%)	316 (3.01%)	0.988077	0.995946	ko04010
	166	Shigellosis	1 (0.24%)	111 (1.06%)	0.989195	0.995946	ko05131
	167	Pyrimidine metabolism	1 (0.24%)	113 (1.07%)	0.990046	0.995946	ko00240
	168	Vascular smooth muscle contraction	3 (0.72%)	225 (2.14%)	0.994545	0.995946	ko04270
	169	RNA transport	2 (0.48%)	187 (1.78%)	0.995796	0.995946	ko03013
	170	Purine metabolism	2 (0.48%)	188 (1.79%)	0.995946	0.995946	ko00230
